# Supplementary material
Source: PubMed Central journal article supplement (PMC6095441)
Supplement: sky183_suppl_supplementary_table_11.pdf [file sky183_suppl_supplementary_table_11.pdf]

Table 11. Supplemental data- Pearson correlation coefficients for original data sets

|       |                             | Independents                |          |                             |                             |         |                             |                             |         |                                |                                |          |                                   |                                   |          |          |
|-------|-----------------------------|-----------------------------|----------|-----------------------------|-----------------------------|---------|-----------------------------|-----------------------------|---------|--------------------------------|--------------------------------|----------|-----------------------------------|-----------------------------------|----------|----------|
|       |                             | 1                           |          |                             | 2                           |         |                             | 3                           |         |                                | 4                              |          |                                   | 5                                 |          |          |
|       |                             | Early L* to Aged Ventral L* |          |                             | Early a* to Aged Ventral L* |         |                             | Early b* to Aged Ventral L* |         |                                | Early Color to Aged Ventral L* |          |                                   | Early marbling to Aged Ventral L* |          |          |
|       |                             | Study                       | N        | Corr                        | Study                       | N       | Corr                        | Study                       | N       | Corr                           | Study                          | N        | Corr                              | Study                             | N        | Corr     |
| 1     | A                           | .                           | .        | .                           | A                           | .       | .                           | A                           | .       | .                              | A                              | .        | .                                 | A                                 | .        | .        |
|       | B                           | .                           | .        | .                           | B                           | .       | .                           | B                           | .       | .                              | B                              | .        | .                                 | B                                 | .        | .        |
|       | C                           | 1234                        |          | 0.25252                     | C                           | 1234    | 0.12515                     | C                           | 1234    | 0.25871                        | C                              | 1231     | -0.46132                          | C                                 | 1231     | -0.07216 |
|       | D                           | 125                         |          | 0.51747                     | D                           | 125     | -0.14529                    | D                           | 125     | -0.03694                       | D                              | 125      | -0.42324                          | D                                 | 125      | -0.07973 |
|       | E                           | 177                         |          | 0.62089                     | E                           | 177     | -0.01354                    | E                           | 177     | 0.44664                        | E                              | 177      | -0.48876                          | E                                 | 177      | -0.08878 |
|       | F                           | 144                         |          | 0.48275                     | F                           | 144     | 0.14783                     | F                           | 144     | 0.46697                        | F                              | 144      | -0.40145                          | F                                 | 144      | -0.07341 |
|       | G                           | 158                         |          | 0.54979                     | G                           | 158     | -0.11428                    | G                           | 158     | 0.41487                        | G                              | 315      | -0.26144                          | G                                 | 314      | -0.13463 |
|       | H                           | 160                         |          | 0.53804                     | H                           | 160     | -0.27114                    | H                           | 160     | 0.09586                        | H                              | 160      | -0.45477                          | H                                 | 160      | -0.3001  |
|       | I                           | 559                         |          | 0.31118                     | I                           | 559     | 0.03146                     | I                           | 559     | 0.11009                        | I                              | 559      | -0.42935                          | I                                 | 558      | -0.06749 |
|       | J                           | 1400                        |          | 0.77793                     | J                           | 1400    | -0.25757                    | J                           | 1400    | 0.61507                        | J                              | 1399     | -0.65717                          | J                                 | 1394     | -0.08095 |
|       | K                           | .                           | .        | .                           | K                           | .       | .                           | K                           | .       | .                              | K                              | .        | .                                 | K                                 | .        | .        |
|       | 2                           | Early L* to Aged ventral a* |          |                             | Early a* to Aged ventral a* |         |                             | Early b* to Aged ventral a* |         |                                | Early Color to Aged ventral a* |          |                                   | Early marbling to Aged ventral a* |          |          |
| Study |                             | N                           | Corr     | Study                       | N                           | Corr    | Study                       | N                           | Corr    | Study                          | N                              | Corr     | Study                             | N                                 | Corr     |          |
| A     |                             | .                           | .        | A                           | .                           | .       | A                           | .                           | .       | A                              | .                              | .        | A                                 | .                                 | .        |          |
| B     |                             | .                           | .        | B                           | .                           | .       | B                           | .                           | .       | B                              | .                              | .        | B                                 | .                                 | .        |          |
| C     |                             | 1234                        | 0.00342  | C                           | 1234                        | 0.35584 | C                           | 1234                        | 0.09805 | C                              | 1231                           | 0.18916  | C                                 | 1231                              | 0.02871  |          |
| D     |                             | 125                         | -0.17418 | D                           | 125                         | 0.51688 | D                           | 125                         | 0.2248  | D                              | 125                            | 0.29149  | D                                 | 125                               | 0.14779  |          |
| E     |                             | 177                         | -0.0997  | E                           | 177                         | 0.37063 | E                           | 177                         | 0.11317 | E                              | 177                            | 0.25311  | E                                 | 177                               | 0.1352   |          |
| F     |                             | 144                         | -0.09491 | F                           | 144                         | 0.59955 | F                           | 144                         | 0.25284 | F                              | 144                            | 0.09815  | F                                 | 144                               | -0.0545  |          |
| G     |                             | 158                         | -0.10568 | G                           | 158                         | 0.16559 | G                           | 158                         | 0.21716 | G                              | 315                            | 0.13355  | G                                 | 314                               | 0.01213  |          |
| H     |                             | 160                         | -0.14749 | H                           | 160                         | 0.69337 | H                           | 160                         | 0.2363  | H                              | 160                            | 0.49559  | H                                 | 160                               | 0.20581  |          |
| I     |                             | 559                         | -0.00352 | I                           | 559                         | 0.25956 | I                           | 559                         | 0.14051 | I                              | 559                            | 0.18229  | I                                 | 558                               | 0.0664   |          |
| J     |                             | 1400                        | -0.19759 | J                           | 1400                        | 0.71985 | J                           | 1400                        | 0.03735 | J                              | 1399                           | 0.26005  | J                                 | 1394                              | -0.01685 |          |
| K     | .                           | .                           | K        | .                           | .                           | K       | .                           | .                           | K       | .                              | .                              | K        | .                                 | .                                 |          |          |
| 3     | Early L* to Aged ventral b* |                             |          | Early a* to Aged ventral b* |                             |         | Early b* to Aged ventral b* |                             |         | Early Color to Aged ventral b* |                                |          | Early marbling to Aged ventral b* |                                   |          |          |
|       | Study                       | N                           | Corr     | Study                       | N                           | Corr    | Study                       | N                           | Corr    | Study                          | N                              | Corr     | Study                             | N                                 | Corr     |          |
|       | A                           | .                           | .        | A                           | .                           | .       | A                           | .                           | .       | A                              | .                              | .        | A                                 | .                                 | .        |          |
|       | B                           | .                           | .        | B                           | .                           | .       | B                           | .                           | .       | B                              | .                              | .        | B                                 | .                                 | .        |          |
|       | C                           | 1234                        | 0.19103  | C                           | 1234                        | 0.22639 | C                           | 1234                        | 0.23443 | C                              | 1231                           | -0.20645 | C                                 | 1231                              | -0.02162 |          |
|       | D                           | 125                         | 0.38869  | D                           | 125                         | 0.16094 | D                           | 125                         | 0.13192 | D                              | 125                            | -0.23532 | D                                 | 125                               | -0.06806 |          |
|       | E                           | 177                         | 0.44334  | E                           | 177                         | 0.16413 | E                           | 177                         | 0.42619 | E                              | 177                            | -0.2738  | E                                 | 177                               | 0.03674  |          |
|       | F                           | 144                         | 0.26699  | F                           | 144                         | 0.31877 | F                           | 144                         | 0.5267  | F                              | 144                            | -0.1156  | F                                 | 144                               | -0.09034 |          |
|       | G                           | 158                         | 0.53183  | G                           | 158                         | 0.20836 | G                           | 158                         | 0.27242 | G                              | 315                            | -0.1341  | G                                 | 314                               | -0.04686 |          |
|       | H                           | 160                         | 0.36995  | H                           | 160                         | 0.24347 | H                           | 160                         | 0.29024 | H                              | 160                            | 0.00239  | H                                 | 160                               | -0.13534 |          |
|       | I                           | 559                         | 0.23555  | I                           | 559                         | 0.37745 | I                           | 559                         | 0.00419 | I                              | 559                            | -0.23936 | I                                 | 558                               | -0.01673 |          |
|       | J                           | 1400                        | 0.41955  | J                           | 1400                        | 0.33473 | J                           | 1400                        | 0.53459 | J                              | 1399                           | -0.24455 | J                                 | 1394                              | -0.0648  |          |
| K     | .                           | .                           | K        | .                           | .                           | K       | .                           | .                           | K       | .                              | .                              | K        | .                                 | .                                 |          |          |

Table 11. Supplemental data- Pearson correlation coefficients for original data sets

|       |                                   | Independents                      |          |                                   |                                   |          |                                   |                                   |          |                                      |                                      |          |                                         |                                         |          |         |
|-------|-----------------------------------|-----------------------------------|----------|-----------------------------------|-----------------------------------|----------|-----------------------------------|-----------------------------------|----------|--------------------------------------|--------------------------------------|----------|-----------------------------------------|-----------------------------------------|----------|---------|
|       |                                   | 1                                 |          |                                   | 2                                 |          |                                   | 3                                 |          |                                      | 4                                    |          |                                         | 5                                       |          |         |
|       |                                   | Early L* to Aged Ventral color    |          |                                   | Early a* to Aged Ventral color    |          |                                   | Early b* to Aged Ventral color    |          |                                      | Early Color to Aged Ventral color    |          |                                         | Early marbling to Aged Ventral color    |          |         |
|       |                                   | Study                             | N        | Corr                              | Study                             | N        | Corr                              | Study                             | N        | Corr                                 | Study                                | N        | Corr                                    | Study                                   | N        | Corr    |
| 4     | A                                 | 151                               |          | -0.22835                          | A                                 | 151      | 0.26133                           | A                                 | 151      | -0.04825                             | A                                    | 151      | 0.33369                                 | A                                       | 151      | 0.00861 |
|       | B                                 | .                                 | .        | .                                 | B                                 | .        | .                                 | B                                 | .        | .                                    | B                                    | .        | .                                       | B                                       | .        | .       |
|       | C                                 | 1234                              |          | -0.3043                           | C                                 | 1234     | -0.04514                          | C                                 | 1234     | -0.31213                             | C                                    | 1231     | 0.51894                                 | C                                       | 1231     | 0.16745 |
|       | D                                 | 125                               |          | -0.48824                          | D                                 | 125      | 0.25582                           | D                                 | 125      | 0.10668                              | D                                    | 125      | 0.58274                                 | D                                       | 125      | 0.12358 |
|       | E                                 | 177                               |          | -0.57049                          | E                                 | 177      | 0.16127                           | E                                 | 177      | -0.34574                             | E                                    | 177      | 0.55768                                 | E                                       | 177      | 0.19179 |
|       | F                                 | 144                               |          | -0.48058                          | F                                 | 144      | 0.01529                           | F                                 | 144      | -0.36575                             | F                                    | 144      | 0.45181                                 | F                                       | 144      | 0.1614  |
|       | G                                 | 158                               |          | -0.22927                          | G                                 | 158      | 0.48277                           | G                                 | 158      | -0.53286                             | G                                    | 314      | 0.05705                                 | G                                       | 313      | 0.34874 |
|       | H                                 | 160                               |          | -0.3144                           | H                                 | 160      | 0.44519                           | H                                 | 160      | -0.09726                             | H                                    | 160      | 0.61929                                 | H                                       | 160      | 0.24661 |
|       | I                                 | 559                               |          | -0.262                            | I                                 | 559      | -0.11544                          | I                                 | 559      | 0.00107                              | I                                    | 559      | 0.41616                                 | I                                       | 558      | 0.24285 |
|       | J                                 | 1400                              |          | -0.47611                          | J                                 | 1400     | 0.24023                           | J                                 | 1400     | -0.34865                             | J                                    | 1399     | 0.61834                                 | J                                       | 1394     | 0.24041 |
|       | K                                 | .                                 | .        | .                                 | K                                 | .        | .                                 | K                                 | .        | .                                    | K                                    | .        | .                                       | K                                       | .        | .       |
|       | 5                                 | Early L* to Aged Ventral marbling |          |                                   | Early a* to Aged Ventral marbling |          |                                   | Early b* to Aged Ventral marbling |          |                                      | Early Color to Aged Ventral marbling |          |                                         | Early marbling to Aged Ventral marbling |          |         |
| Study |                                   | N                                 | Corr     | Study                             | N                                 | Corr     | Study                             | N                                 | Corr     | Study                                | N                                    | Corr     | Study                                   | N                                       | Corr     |         |
| A     |                                   | 151                               | -0.0345  | A                                 | 151                               | 0.13233  | A                                 | 151                               | 0.1607   | A                                    | 151                                  | 0.33611  | A                                       | 151                                     | 0.37418  |         |
| B     |                                   | .                                 | .        | B                                 | .                                 | .        | B                                 | .                                 | .        | B                                    | .                                    | .        | B                                       | .                                       | .        |         |
| C     |                                   | 1234                              | 0.05905  | C                                 | 1234                              | -0.01267 | C                                 | 1234                              | -0.04501 | C                                    | 1231                                 | 0.07578  | C                                       | 1231                                    | 0.60621  |         |
| D     |                                   | 125                               | 0.01896  | D                                 | 125                               | 0.26     | D                                 | 125                               | -0.01023 | D                                    | 125                                  | 0.1458   | D                                       | 125                                     | 0.69547  |         |
| E     |                                   | 177                               | -0.04988 | E                                 | 177                               | 0.02361  | E                                 | 177                               | 0.00275  | E                                    | 177                                  | 0.05514  | E                                       | 177                                     | 0.54205  |         |
| F     |                                   | 144                               | 0.04681  | F                                 | 144                               | 0.08017  | F                                 | 144                               | -0.09058 | F                                    | 144                                  | -0.15911 | F                                       | 144                                     | 0.68492  |         |
| G     |                                   | 158                               | 0.05337  | G                                 | 158                               | 0.29536  | G                                 | 158                               | -0.27786 | G                                    | 314                                  | 0.04264  | G                                       | 313                                     | 0.66206  |         |
| H     |                                   | 160                               | 0.08501  | H                                 | 160                               | 0.15644  | H                                 | 160                               | 0.17117  | H                                    | 160                                  | 0.16384  | H                                       | 160                                     | 0.67473  |         |
| I     |                                   | 559                               | 0.10914  | I                                 | 559                               | -0.05832 | I                                 | 559                               | 0.11007  | I                                    | 559                                  | 0.18127  | I                                       | 558                                     | 0.61214  |         |
| J     |                                   | 1400                              | 0.02287  | J                                 | 1400                              | 0.06271  | J                                 | 1400                              | 0.10621  | J                                    | 1399                                 | 0.26399  | J                                       | 1394                                    | 0.66222  |         |
| K     | .                                 | .                                 | .        | K                                 | .                                 | .        | K                                 | .                                 | .        | K                                    | .                                    | .        | K                                       | .                                       | .        |         |
| 6     | Early L* to Aged Ventral firmness |                                   |          | Early a* to Aged Ventral firmness |                                   |          | Early b* to Aged Ventral firmness |                                   |          | Early Color to Aged Ventral firmness |                                      |          | Early marbling to Aged Ventral firmness |                                         |          |         |
|       | Study                             | N                                 | Corr     | Study                             | N                                 | Corr     | Study                             | N                                 | Corr     | Study                                | N                                    | Corr     | Study                                   | N                                       | Corr     |         |
|       | A                                 | 151                               | -0.05816 | A                                 | 151                               | 0.15556  | A                                 | 151                               | 0.04244  | A                                    | 151                                  | 0.07902  | A                                       | 151                                     | 0.05688  |         |
|       | B                                 | .                                 | .        | B                                 | .                                 | .        | B                                 | .                                 | .        | B                                    | .                                    | .        | B                                       | .                                       | .        |         |
|       | C                                 | 1234                              | 0.04234  | C                                 | 1234                              | -0.00831 | C                                 | 1234                              | 0.06055  | C                                    | 1231                                 | 0.01317  | C                                       | 1231                                    | 0.13918  |         |
|       | D                                 | 125                               | -0.04423 | D                                 | 125                               | -0.08703 | D                                 | 125                               | -0.0776  | D                                    | 125                                  | 0.06003  | D                                       | 125                                     | -0.07172 |         |
|       | E                                 | 177                               | 0.0958   | E                                 | 177                               | 0.06437  | E                                 | 177                               | 0.08185  | E                                    | 177                                  | 0.08658  | E                                       | 177                                     | 0.35577  |         |
|       | F                                 | 144                               | -0.26014 | F                                 | 144                               | 0.13205  | F                                 | 144                               | -0.13613 | F                                    | 144                                  | 0.12142  | F                                       | 144                                     | 0.17676  |         |
|       | G                                 | 158                               | 0.12164  | G                                 | 158                               | 0.34436  | G                                 | 158                               | -0.27977 | G                                    | 314                                  | -0.01675 | G                                       | 313                                     | 0.17958  |         |
|       | H                                 | 160                               | 0.10451  | H                                 | 160                               | -0.00983 | H                                 | 160                               | 0.05024  | H                                    | 160                                  | 0.01606  | H                                       | 160                                     | 0.12683  |         |
|       | I                                 | 559                               | -0.02009 | I                                 | 559                               | -0.10425 | I                                 | 559                               | 0.03238  | I                                    | 559                                  | 0.12259  | I                                       | 558                                     | 0.16854  |         |
|       | J                                 | 1400                              | -0.26852 | J                                 | 1400                              | 0.16064  | J                                 | 1400                              | -0.1186  | J                                    | 1399                                 | 0.40847  | J                                       | 1394                                    | 0.47926  |         |
| K     | .                                 | .                                 | .        | K                                 | .                                 | .        | K                                 | .                                 | .        | K                                    | .                                    | .        | K                                       | .                                       | .        |         |

Table 11. Supplemental data- Pearson correlation coefficients for original data sets

|   |                          | Independents             |          |                          |                          |         |                          |                          |          |                             |                             |          |                                |                                |         |          |
|---|--------------------------|--------------------------|----------|--------------------------|--------------------------|---------|--------------------------|--------------------------|----------|-----------------------------|-----------------------------|----------|--------------------------------|--------------------------------|---------|----------|
|   |                          | 1                        |          |                          | 2                        |         |                          | 3                        |          |                             | 4                           |          |                                | 5                              |         |          |
|   |                          | Early L* to Aged chop L* |          |                          | Early a* to Aged chop L* |         |                          | Early b* to Aged chop L* |          |                             | Early Color to Aged chop L* |          |                                | Early marbling to Aged chop L* |         |          |
|   |                          | Study                    | N        | Corr                     | Study                    | N       | Corr                     | Study                    | N        | Corr                        | Study                       | N        | Corr                           | Study                          | N       | Corr     |
| 7 | A                        | 151                      |          | 0.30182                  | A                        | 151     | -0.29564                 | A                        | 151      | 0.12238                     | A                           | 151      | -0.34834                       | A                              | 151     | -0.01679 |
|   | B                        | 807                      |          | 0.60203                  | B                        | 807     | -0.15289                 | B                        | 807      | 0.42632                     | B                           | 817      | -0.40042                       | B                              | 817     | -0.03188 |
|   | C                        | 1234                     |          | 0.3273                   | C                        | 1234    | 0.08177                  | C                        | 1234     | 0.25743                     | C                           | 1231     | -0.47911                       | C                              | 1231    | -0.1335  |
|   | D                        | 125                      |          | 0.58683                  | D                        | 125     | -0.20378                 | D                        | 125      | -0.05399                    | D                           | 125      | -0.55728                       | D                              | 125     | -0.14191 |
|   | E                        | 177                      |          | 0.51016                  | E                        | 177     | 0.05257                  | E                        | 177      | 0.37154                     | E                           | 177      | -0.38273                       | E                              | 177     | -0.13865 |
|   | F                        | 144                      |          | 0.52444                  | F                        | 144     | 0.08545                  | F                        | 144      | 0.42397                     | F                           | 144      | -0.36813                       | F                              | 144     | -0.08315 |
|   | G                        | 158                      |          | 0.05784                  | G                        | 158     | -0.08308                 | G                        | 158      | -0.06879                    | G                           | 295      | -0.10189                       | G                              | 294     | 0.10061  |
|   | H                        | 160                      | 0.41329  |                          | H                        | 160     | -0.25478                 | H                        | 160      | 0.10154                     | H                           | 160      | -0.43903                       | H                              | 160     | -0.19812 |
|   | I                        | 559                      |          | 0.38961                  | I                        | 559     | 0.10351                  | I                        | 559      | 0.07407                     | I                           | 559      | -0.37626                       | I                              | 558     | -0.03247 |
|   | J                        | 525                      |          | 0.67441                  | J                        | 525     | -0.28589                 | J                        | 525      | 0.54811                     | J                           | 525      | -0.67872                       | J                              | 522     | -0.1629  |
|   | K                        | 173                      |          | 0.12983                  | K                        | 173     | 0.03151                  | K                        | 173      | 0.14616                     | K                           | 173      | -0.32134                       | K                              | 173     | -0.01472 |
| 8 | Early L* to Aged chop a* |                          |          | Early a* to Aged chop a* |                          |         | Early b* to Aged chop a* |                          |          | Early Color to Aged chop a* |                             |          | Early marbling to Aged chop a* |                                |         |          |
|   | Study                    | N                        | Corr     | Study                    | N                        | Corr    | Study                    | N                        | Corr     | Study                       | N                           | Corr     | Study                          | N                              | Corr    |          |
|   | A                        | 151                      | -0.23488 | A                        | 151                      | 0.5268  | A                        | 151                      | 0.12917  | A                           | 151                         | 0.35614  | A                              | 151                            | 0.043   |          |
|   | B                        | 807                      | -0.19019 | B                        | 807                      | 0.52408 | B                        | 807                      | -0.00267 | B                           | 817                         | 0.14642  | B                              | 817                            | 0.06873 |          |
|   | C                        | 1234                     | 0.0564   | C                        | 1234                     | 0.40724 | C                        | 1234                     | 0.06813  | C                           | 1231                        | 0.2419   | C                              | 1231                           | 0.13559 |          |
|   | D                        | 125                      | -0.1114  | D                        | 125                      | 0.66905 | D                        | 125                      | 0.00823  | D                           | 125                         | 0.4173   | D                              | 125                            | 0.27038 |          |
|   | E                        | 177                      | 0.1021   | E                        | 177                      | 0.32411 | E                        | 177                      | 0.24231  | E                           | 177                         | -0.01241 | E                              | 177                            | 0.13708 |          |
|   | F                        | 144                      | 0.01736  | F                        | 144                      | 0.62803 | F                        | 144                      | 0.26753  | F                           | 144                         | -0.00307 | F                              | 144                            | 0.03982 |          |
|   | G                        | 158                      | -0.01499 | G                        | 158                      | 0.28259 | G                        | 158                      | -0.20568 | G                           | 295                         | -0.03056 | G                              | 294                            | 0.16946 |          |
|   | H                        | 160                      | -0.08902 | H                        | 160                      | 0.66446 | H                        | 160                      | 0.28533  | H                           | 160                         | 0.49151  | H                              | 160                            | 0.16032 |          |
|   | I                        | 559                      | 0.05443  | I                        | 559                      | 0.27852 | I                        | 559                      | 0.18179  | I                           | 559                         | 0.10065  | I                              | 558                            | 0.0799  |          |
| J | 525                      | -0.25294                 | J        | 525                      | 0.61317                  | J       | 525                      | -0.0331                  | J        | 525                         | 0.4249                      | J        | 522                            | 0.16478                        |         |          |
| K | 173                      | 0.0254                   | K        | 173                      | 0.32437                  | K       | 173                      | 0.12292                  | K        | 173                         | 0.19578                     | K        | 173                            | 0.0825                         |         |          |
| 9 | Early L* to Aged chop b* |                          |          | Early a* to Aged chop b* |                          |         | Early b* to Aged chop b* |                          |          | Early Color to Aged chop b* |                             |          | Early marbling to Aged chop b* |                                |         |          |
|   | Study                    | N                        | Corr     | Study                    | N                        | Corr    | Study                    | N                        | Corr     | Study                       | N                           | Corr     | Study                          | N                              | Corr    |          |
|   | A                        | 151                      | -0.03531 | A                        | 151                      | 0.30653 | A                        | 151                      | 0.22214  | A                           | 151                         | 0.10106  | A                              | 151                            | 0.06175 |          |
|   | B                        | 807                      | 0.28236  | B                        | 807                      | 0.23176 | B                        | 807                      | 0.41839  | B                           | 817                         | -0.08753 | B                              | 817                            | 0.09488 |          |
|   | C                        | 1234                     | 0.3189   | C                        | 1234                     | 0.27749 | C                        | 1234                     | 0.15105  | C                           | 1231                        | -0.1739  | C                              | 1231                           | 0.05336 |          |
|   | D                        | 125                      | 0.45219  | D                        | 125                      | 0.28026 | D                        | 125                      | -0.03904 | D                           | 125                         | -0.21226 | D                              | 125                            | 0.06381 |          |
|   | E                        | 177                      | 0.49321  | E                        | 177                      | 0.25335 | E                        | 177                      | 0.47374  | E                           | 177                         | -0.30258 | E                              | 177                            | 0.06535 |          |
|   | F                        | 144                      | 0.45226  | F                        | 144                      | 0.3191  | F                        | 144                      | 0.54332  | F                           | 144                         | -0.20227 | F                              | 144                            | -0.0174 |          |
|   | G                        | 158                      | -0.00026 | G                        | 158                      | 0.07924 | G                        | 158                      | -0.16447 | G                           | 295                         | -0.01002 | G                              | 294                            | 0.11706 |          |
|   | H                        | 160                      | 0.33235  | H                        | 160                      | 0.27937 | H                        | 160                      | 0.3444   | H                           | 160                         | 0.09618  | H                              | 160                            | -0.0532 |          |
|   | I                        | 559                      | 0.35414  | I                        | 559                      | 0.21922 | I                        | 559                      | 0.22356  | I                           | 559                         | -0.20482 | I                              | 558                            | 0.07867 |          |
| J | 525                      | 0.40043                  | J        | 525                      | -0.03386                 | J       | 525                      | 0.46975                  | J        | 525                         | -0.2959                     | J        | 522                            | 0.05389                        |         |          |
| K | 173                      | 0.03749                  | K        | 173                      | 0.15284                  | K       | 173                      | 0.17671                  | K        | 173                         | -0.22959                    | K        | 173                            | 0.02309                        |         |          |

Table 11. Supplemental data- Pearson correlation coefficients for original data sets

|    |                                | Independents                   |      |                                |                                |      |                                |                                |      |                                   |                                   |          |                                      |                                      |      |          |   |      |  |          |
|----|--------------------------------|--------------------------------|------|--------------------------------|--------------------------------|------|--------------------------------|--------------------------------|------|-----------------------------------|-----------------------------------|----------|--------------------------------------|--------------------------------------|------|----------|---|------|--|----------|
|    |                                | 1                              |      |                                | 2                              |      |                                | 3                              |      |                                   | 4                                 |          |                                      | 5                                    |      |          |   |      |  |          |
|    |                                | Early L* to Aged chop color    |      |                                | Early a* to Aged chop color    |      |                                | Early b* to Aged chop color    |      |                                   | Early Color to Aged chop color    |          |                                      | Early marbling to Aged chop color    |      |          |   |      |  |          |
|    |                                | Study                          | N    | Corr                           | Study                          | N    | Corr                           | Study                          | N    | Corr                              | Study                             | N        | Corr                                 | Study                                | N    | Corr     |   |      |  |          |
| 10 | A                              | .                              | .    | .                              | A                              | .    | .                              | A                              | .    | .                                 | A                                 | .        | .                                    | A                                    | .    | .        |   |      |  |          |
|    | B                              | 807                            |      | -0.34915                       | B                              | 807  |                                | 0.08558                        | B    | 807                               |                                   | -0.23581 | B                                    | 817                                  |      | 0.37709  | B | 817  |  | 0.2566   |
|    | C                              | 1234                           |      | -0.22957                       | C                              | 1234 |                                | -0.05394                       | C    | 1234                              |                                   | -0.27202 | C                                    | 1231                                 |      | 0.43991  | C | 1231 |  | 0.18726  |
|    | D                              | 125                            |      | -0.37358                       | D                              | 125  |                                | 0.25131                        | D    | 125                               |                                   | 0.12112  | D                                    | 125                                  |      | 0.48415  | D | 125  |  | 0.27166  |
|    | E                              | 177                            |      | -0.52605                       | E                              | 177  |                                | 0.21074                        | E    | 177                               |                                   | -0.27494 | E                                    | 177                                  |      | 0.4964   | E | 177  |  | 0.23818  |
|    | F                              | 144                            |      | -0.53248                       | F                              | 144  |                                | 0.0373                         | F    | 144                               |                                   | -0.31431 | F                                    | 144                                  |      | 0.47593  | F | 144  |  | 0.11628  |
|    | G                              | 158                            |      | -0.08442                       | G                              | 158  |                                | 0.55696                        | G    | 158                               |                                   | -0.53236 | G                                    | 304                                  |      | 0.11552  | G | 303  |  | 0.32999  |
|    | H                              | 160                            |      | -0.2569                        | H                              | 160  |                                | 0.4905                         | H    | 160                               |                                   | 0.05192  | H                                    | 160                                  |      | 0.58144  | H | 160  |  | 0.24215  |
|    | I                              | 559                            |      | -0.24945                       | I                              | 559  |                                | -0.12511                       | I    | 559                               |                                   | 0.01715  | I                                    | 559                                  |      | 0.40473  | I | 558  |  | 0.19277  |
|    | J                              | 525                            |      | -0.57141                       | J                              | 525  |                                | 0.30153                        | J    | 525                               |                                   | -0.43166 | J                                    | 525                                  |      | 0.63376  | J | 522  |  | 0.31247  |
|    | K                              | .                              |      | .                              | K                              | .    |                                | .                              | K    | .                                 |                                   | .        | K                                    | .                                    |      | .        | K | .    |  | .        |
|    | 11                             | Early L* to Aged chop marbling |      |                                | Early a* to Aged chop marbling |      |                                | Early b* to Aged chop marbling |      |                                   | Early Color to Aged chop marbling |          |                                      | Early marbling to Aged chop marbling |      |          |   |      |  |          |
|    |                                | Study                          | N    | Corr                           | Study                          | N    | Corr                           | Study                          | N    | Corr                              | Study                             | N        | Corr                                 | Study                                | N    | Corr     |   |      |  |          |
| A  |                                | .                              | .    | A                              | .                              | .    | A                              | .                              | .    | A                                 | .                                 | .        | A                                    | .                                    | .    |          |   |      |  |          |
| B  |                                | 807                            |      | 0.13318                        | B                              | 807  |                                | 0.11118                        | B    | 807                               |                                   | 0.19511  | B                                    | 817                                  |      | 0.2141   | B | 817  |  | 0.58881  |
| C  |                                | 1234                           |      | 0.0865                         | C                              | 1234 |                                | 0.10281                        | C    | 1234                              |                                   | 0.06408  | C                                    | 1231                                 |      | 0.05712  | C | 1231 |  | 0.50572  |
| D  |                                | 125                            |      | 0.04008                        | D                              | 125  |                                | 0.25507                        | D    | 125                               |                                   | -0.04521 | D                                    | 125                                  |      | 0.1738   | D | 125  |  | 0.69681  |
| E  |                                | 177                            |      | -0.16802                       | E                              | 177  |                                | 0.14646                        | E    | 177                               |                                   | -0.00275 | E                                    | 177                                  |      | 0.20973  | E | 177  |  | 0.59586  |
| F  |                                | 144                            |      | 0.08328                        | F                              | 144  |                                | 0.15401                        | F    | 144                               |                                   | -0.0285  | F                                    | 144                                  |      | -0.21371 | F | 144  |  | 0.47596  |
| G  |                                | 158                            |      | 0.18347                        | G                              | 158  |                                | 0.34403                        | G    | 158                               |                                   | -0.20385 | G                                    | 302                                  |      | -0.06775 | G | 301  |  | 0.5765   |
| H  |                                | 160                            |      | 0.04696                        | H                              | 160  |                                | 0.13548                        | H    | 160                               |                                   | 0.18577  | H                                    | 160                                  |      | 0.09532  | H | 160  |  | 0.45832  |
| I  |                                | 559                            |      | 0.15834                        | I                              | 559  |                                | -0.02225                       | I    | 559                               |                                   | 0.18994  | I                                    | 559                                  |      | 0.10786  | I | 558  |  | 0.56903  |
| J  |                                | 525                            |      | -0.07808                       | J                              | 525  |                                | 0.0923                         | J    | 525                               |                                   | 0.01274  | J                                    | 525                                  |      | 0.31444  | J | 522  |  | 0.61772  |
| K  |                                | .                              |      | .                              | K                              | .    |                                | .                              | K    | .                                 |                                   | .        | K                                    | .                                    |      | .        | K | .    |  | .        |
| 12 | Early L* to Aged chop firmness |                                |      | Early a* to Aged chop firmness |                                |      | Early b* to Aged chop firmness |                                |      | Early Color to Aged chop firmness |                                   |          | Early marbling to Aged chop firmness |                                      |      |          |   |      |  |          |
|    | Study                          | N                              | Corr | Study                          | N                              | Corr | Study                          | N                              | Corr | Study                             | N                                 | Corr     | Study                                | N                                    | Corr |          |   |      |  |          |
|    | A                              | 151                            |      | -0.10182                       | A                              | 151  |                                | 0.16507                        | A    | 151                               |                                   | 0.00859  | A                                    | 151                                  |      | 0.11052  | A | 151  |  | 0.09012  |
|    | B                              | 807                            |      | -0.06184                       | B                              | 807  |                                | 0.11824                        | B    | 807                               |                                   | 0.0292   | B                                    | 817                                  |      | 0.09701  | B | 817  |  | 0.12307  |
|    | C                              | 1234                           |      | -0.00528                       | C                              | 1234 |                                | -0.06576                       | C    | 1234                              |                                   | -0.04476 | C                                    | 1231                                 |      | -0.04265 | C | 1231 |  | 0.12109  |
|    | D                              | 125                            |      | 0.01212                        | D                              | 125  |                                | 0.02075                        | D    | 125                               |                                   | 0.0465   | D                                    | 125                                  |      | 0.10549  | D | 125  |  | 0.19191  |
|    | E                              | .                              |      | .                              | E                              | .    |                                | .                              | E    | .                                 |                                   | .        | E                                    | .                                    |      | .        | E | .    |  | .        |
|    | F                              | 144                            |      | -0.08043                       | F                              | 144  |                                | 0.09178                        | F    | 144                               |                                   | 0.08799  | F                                    | 144                                  |      | 0.04403  | F | 144  |  | -0.06459 |
|    | G                              | .                              |      | .                              | G                              | .    |                                | .                              | G    | .                                 |                                   | .        | G                                    | .                                    |      | .        | G | .    |  | .        |
|    | H                              | 160                            |      | 0.03006                        | H                              | 160  |                                | 0.0183                         | H    | 160                               |                                   | 0.1059   | H                                    | 160                                  |      | 0.01444  | H | 160  |  | 0.20656  |
|    | I                              | 559                            |      | 0.01616                        | I                              | 559  |                                | 0.04372                        | I    | 559                               |                                   | -0.01426 | I                                    | 559                                  |      | 0.10743  | I | 558  |  | 0.13726  |
|    | J                              | .                              |      | .                              | J                              | .    |                                | .                              | J    | .                                 |                                   | .        | J                                    | .                                    |      | .        | J | .    |  | .        |
|    | K                              | .                              |      | .                              | K                              | .    |                                | .                              | K    | .                                 |                                   | .        | K                                    | .                                    |      | .        | K | .    |  | .        |

Table 11. Supplemental data- Pearson correlation coefficients for original data sets

|    |                        | Independents                        |          |                        |                                     |          |                        |                                     |          |                           |                                        |          |                              |                                           |          |          |
|----|------------------------|-------------------------------------|----------|------------------------|-------------------------------------|----------|------------------------|-------------------------------------|----------|---------------------------|----------------------------------------|----------|------------------------------|-------------------------------------------|----------|----------|
|    |                        | 1                                   |          |                        | 2                                   |          |                        | 3                                   |          |                           | 4                                      |          |                              | 5                                         |          |          |
|    |                        | Early L* to Instrumental tenderness |          |                        | Early a* to Instrumental tenderness |          |                        | Early b* to Instrumental tenderness |          |                           | Early Color to Instrumental tenderness |          |                              | Early marbling to Instrumental tenderness |          |          |
|    |                        | Study                               | N        | Corr                   | Study                               | N        | Corr                   | Study                               | N        | Corr                      | Study                                  | N        | Corr                         | Study                                     | N        | Corr     |
| 13 | A                      | 151                                 |          | -0.12825               | A                                   | 151      | 0.05133                | A                                   | 151      | -0.04425                  | A                                      | 151      | 0.11083                      | A                                         | 151      | 0.04272  |
|    | B                      | 807                                 |          | -0.22242               | B                                   | 807      | -0.03853               | B                                   | 807      | -0.31125                  | B                                      | 817      | -0.12566                     | B                                         | 817      | -0.1886  |
|    | C                      | 1233                                |          | -0.0396                | C                                   | 1233     | -0.0515                | C                                   | 1233     | -0.07087                  | C                                      | 1229     | 0.04288                      | C                                         | 1229     | -0.08952 |
|    | D                      | 118                                 |          | -0.05253               | D                                   | 118      | -0.12711               | D                                   | 118      | 0.05219                   | D                                      | 118      | -0.00289                     | D                                         | 118      | -0.18202 |
|    | E                      | 177                                 |          | -0.36704               | E                                   | 177      | -0.36704               | E                                   | 177      | -0.31837                  | E                                      | 177      | 0.21843                      | E                                         | 177      | 0.0533   |
|    | F                      | 144                                 |          | -0.14379               | F                                   | 144      | -0.11169               | F                                   | 144      | -0.00714                  | F                                      | 144      | 0.16555                      | F                                         | 144      | -0.08266 |
|    | G                      | 157                                 |          | -0.24345               | G                                   | 157      | -0.04679               | G                                   | 157      | -0.13354                  | G                                      | 300      | -0.02845                     | G                                         | 299      | 0.05177  |
|    | H                      | 160                                 |          | -0.20203               | H                                   | 160      | 0.05781                | H                                   | 160      | -0.06352                  | H                                      | 160      | 0.09707                      | H                                         | 160      | -0.03825 |
|    | I                      | 555                                 |          | -0.21613               | I                                   | 555      | -0.04574               | I                                   | 555      | -0.16199                  | I                                      | 555      | -0.02424                     | I                                         | 554      | -0.13998 |
|    | J                      | 1400                                |          | -0.19068               | J                                   | 1400     | -0.11963               | J                                   | 1400     | -0.24224                  | J                                      | 1399     | -0.03707                     | J                                         | 1394     | -0.04017 |
|    | K                      | 173                                 |          | -0.04519               | K                                   | 173      | 0.04442                | K                                   | 173      | -0.09313                  | K                                      | 173      | -0.00224                     | K                                         | 173      | -0.21871 |
|    | 14                     | Early L* to Cook loss               |          |                        | Early a* to Cook loss               |          |                        | Early b* to Cook loss               |          |                           | Early Color to Cook loss               |          |                              | Early marbling to Cook loss               |          |          |
|    |                        | Study                               | N        | Corr                   | Study                               | N        | Corr                   | Study                               | N        | Corr                      | Study                                  | N        | Corr                         | Study                                     | N        | Corr     |
| A  |                        | 149                                 | 0.1159   | A                      | 149                                 | -0.01741 | A                      | 149                                 | 0.10583  | A                         | 149                                    | -0.09999 | A                            | 149                                       | -0.00358 |          |
| B  |                        | 807                                 | 0.22349  | B                      | 807                                 | 0.10919  | B                      | 807                                 | 0.07823  | B                         | 817                                    | -0.25646 | B                            | 817                                       | -0.1248  |          |
| C  |                        | 1232                                | 0.08122  | C                      | 1232                                | 0.06791  | C                      | 1232                                | 0.10618  | C                         | 1229                                   | -0.10889 | C                            | 1229                                      | -0.14439 |          |
| D  |                        | 118                                 | 0.09603  | D                      | 118                                 | 0.04443  | D                      | 118                                 | -0.05297 | D                         | 118                                    | -0.07017 | D                            | 118                                       | -0.08829 |          |
| E  |                        | 177                                 | 0.37204  | E                      | 177                                 | -0.0558  | E                      | 177                                 | 0.17608  | E                         | 177                                    | -0.07045 | E                            | 177                                       | -0.08716 |          |
| F  |                        | 144                                 | 0.11092  | F                      | 144                                 | 0.01352  | F                      | 144                                 | 0.04603  | F                         | 144                                    | -0.11916 | F                            | 144                                       | 0.08424  |          |
| G  |                        | 158                                 | 0.04638  | G                      | 158                                 | -0.24834 | G                      | 158                                 | 0.34989  | G                         | 302                                    | 0.02178  | G                            | 301                                       | -0.22155 |          |
| H  |                        | 160                                 | 0.1075   | H                      | 160                                 | -0.04841 | H                      | 160                                 | 0.07491  | H                         | 160                                    | -0.08897 | H                            | 160                                       | -0.04779 |          |
| I  |                        | 557                                 | -0.0071  | I                      | 557                                 | 0.02072  | I                      | 557                                 | -0.03017 | I                         | 557                                    | -0.01596 | I                            | 556                                       | 0.00654  |          |
| J  |                        | 1400                                | 0.39511  | J                      | 1400                                | 0.05721  | J                      | 1400                                | 0.36177  | J                         | 1399                                   | -0.46967 | J                            | 1394                                      | -0.26133 |          |
| K  |                        | 171                                 | 0.20448  | K                      | 171                                 | 0.14288  | K                      | 171                                 | 0.24373  | K                         | 171                                    | -0.06413 | K                            | 171                                       | -0.00667 |          |
| 15 | Early L* to Tenderness |                                     |          | Early a* to Tenderness |                                     |          | Early b* to Tenderness |                                     |          | Early Color to Tenderness |                                        |          | Early marbling to Tenderness |                                           |          |          |
|    | Study                  | N                                   | Corr     | Study                  | N                                   | Corr     | Study                  | N                                   | Corr     | Study                     | N                                      | Corr     | Study                        | N                                         | Corr     |          |
|    | A                      | 151                                 | -0.07135 | A                      | 151                                 | -0.01262 | A                      | 151                                 | -0.12187 | A                         | 151                                    | -0.03617 | A                            | 151                                       | -0.03702 |          |
|    | B                      | .                                   | .        | B                      | .                                   | .        | B                      | .                                   | .        | B                         | .                                      | .        | B                            | .                                         | .        |          |
|    | C                      | 304                                 | -0.07727 | C                      | 304                                 | -0.11802 | C                      | 304                                 | 0.06388  | C                         | 300                                    | 0.05202  | C                            | 300                                       | 0.00139  |          |
|    | D                      | 125                                 | -0.05556 | D                      | 125                                 | 0.05341  | D                      | 125                                 | 0.03221  | D                         | 125                                    | 0.07197  | D                            | 125                                       | 0.20108  |          |
|    | E                      | .                                   | .        | E                      | .                                   | .        | E                      | .                                   | .        | E                         | .                                      | .        | E                            | .                                         | .        |          |
|    | F                      | 144                                 | -0.00487 | F                      | 144                                 | 0.10314  | F                      | 144                                 | 0.00482  | F                         | 144                                    | -0.07245 | F                            | 144                                       | -0.00009 |          |
|    | G                      | .                                   | .        | G                      | .                                   | .        | G                      | .                                   | .        | G                         | .                                      | .        | G                            | .                                         | .        |          |
|    | H                      | 160                                 | 0.02925  | H                      | 160                                 | -0.05029 | H                      | 160                                 | 0.02842  | H                         | 160                                    | -0.14804 | H                            | 160                                       | -0.05222 |          |
|    | I                      | 147                                 | 0.12396  | I                      | 147                                 | -0.21903 | I                      | 147                                 | 0.19369  | I                         | 147                                    | -0.04669 | I                            | 147                                       | 0.27097  |          |
|    | J                      | 525                                 | -0.13592 | J                      | 525                                 | -0.09476 | J                      | 525                                 | -0.12732 | J                         | 525                                    | 0.18384  | J                            | 522                                       | 0.24294  |          |
|    | K                      | .                                   | .        | K                      | .                                   | .        | K                      | .                                   | .        | K                         | .                                      | .        | K                            | .                                         | .        |          |

Table 11. Supplemental data- Pearson correlation coefficients for original data sets

|            |   | Independents          |   |          |                       |     |      |                       |   |      |                          |          |      |                             |   |          |   |     |   |          |
|------------|---|-----------------------|---|----------|-----------------------|-----|------|-----------------------|---|------|--------------------------|----------|------|-----------------------------|---|----------|---|-----|---|----------|
|            |   | 1                     |   |          | 2                     |     |      | 3                     |   |      | 4                        |          |      | 5                           |   |          |   |     |   |          |
| Dependents |   | Early L* to Juiciness |   |          | Early a* to Juiciness |     |      | Early b* to Juiciness |   |      | Early Color to Juiciness |          |      | Early marbling to Juiciness |   |          |   |     |   |          |
|            |   | Study                 | N | Corr     | Study                 | N   | Corr | Study                 | N | Corr | Study                    | N        | Corr | Study                       | N | Corr     |   |     |   |          |
| 16         | A | 151                   |   | 0.05525  | A                     | 151 |      | 0.04913               | A | 151  |                          | 0.06044  | A    | 151                         |   | -0.03555 | A | 151 |   | -0.05298 |
|            | B | .                     | . | .        | B                     | .   | .    | .                     | B | .    | .                        | .        | B    | .                           | . | .        | B | .   | . | .        |
|            | C | 304                   |   | -0.01594 | C                     | 304 |      | -0.08202              | C | 304  |                          | 0.07226  | C    | 300                         |   | 0.02068  | C | 300 |   | -0.07618 |
|            | D | 125                   |   | -0.12969 | D                     | 125 |      | 0.00528               | D | 125  |                          | -0.03949 | D    | 125                         |   | 0.10801  | D | 125 |   | 0.1724   |
|            | E | .                     | . | .        | E                     | .   | .    | .                     | E | .    | .                        | .        | E    | .                           | . | .        | E | .   | . | .        |
|            | F | 144                   |   | -0.01942 | F                     | 144 |      | 0.10427               | F | 144  |                          | 0.00062  | F    | 144                         |   | -0.05122 | F | 144 |   | -0.13053 |
|            | G | .                     | . | .        | G                     | .   | .    | .                     | G | .    | .                        | .        | G    | .                           | . | .        | G | .   | . | .        |
|            | H | 160                   |   | 0.02367  | H                     | 160 |      | -0.15947              | H | 160  |                          | 0.00528  | H    | 160                         |   | -0.14522 | H | 160 |   | -0.0382  |
|            | I | 147                   |   | -0.01119 | I                     | 147 |      | 0.0212                | I | 147  |                          | 0.11686  | I    | 147                         |   | -0.02698 | I | 147 |   | 0.00281  |
|            | J | 525                   |   | -0.18627 | J                     | 525 |      | -0.10335              | J | 525  |                          | -0.15556 | J    | 525                         |   | 0.26277  | J | 522 |   | 0.17028  |
|            | K | .                     | . | .        | K                     | .   | .    | .                     | K | .    | .                        | .        | K    | .                           | . | .        | K | .   | . | .        |
| 17         |   | Early L* to Flavor    |   |          | Early a* to Flavor    |     |      | Early b* to Flavor    |   |      | Early Color to Flavor    |          |      | Early marbling to Flavor    |   |          |   |     |   |          |
|            | A | .                     | . | .        | A                     | .   | .    | .                     | A | .    | .                        | .        | A    | .                           | . | .        | A | .   | . | .        |
|            | B | .                     | . | .        | B                     | .   | .    | .                     | B | .    | .                        | .        | B    | .                           | . | .        | B | .   | . | .        |
|            | C | 304                   |   | -0.00976 | C                     | 304 |      | -0.03871              | C | 304  |                          | -0.03061 | C    | 300                         |   | -0.00621 | C | 300 |   | -0.04728 |
|            | D | 125                   |   | 0.07038  | D                     | 125 |      | -0.04812              | D | 125  |                          | 0.0698   | D    | 125                         |   | -0.11376 | D | 125 |   | -0.2177  |
|            | E | .                     | . | .        | E                     | .   | .    | .                     | E | .    | .                        | .        | E    | .                           | . | .        | E | .   | . | .        |
|            | F | 144                   |   | -0.06713 | F                     | 144 |      | 0.10995               | F | 144  |                          | 0.05954  | F    | 144                         |   | 0.08833  | F | 144 |   | -0.13055 |
|            | G | .                     | . | .        | G                     | .   | .    | .                     | G | .    | .                        | .        | G    | .                           | . | .        | G | .   | . | .        |
|            | H | 160                   |   | -0.03249 | H                     | 160 |      | -0.00853              | H | 160  |                          | -0.02245 | H    | 160                         |   | -0.00567 | H | 160 |   | -0.03362 |
|            | I | 147                   |   | -0.09475 | I                     | 147 |      | 0.27886               | I | 147  |                          | -0.23491 | I    | 147                         |   | 0.05618  | I | 147 |   | -0.08905 |
|            | J | 525                   |   | 0.06995  | J                     | 525 |      | -0.23537              | J | 525  |                          | 0.05194  | J    | 525                         |   | 0.22811  | J | 522 |   | 0.14402  |
| K          | . | .                     | . | K        | .                     | .   | .    | K                     | . | .    | .                        | K        | .    | .                           | . | K        | . | .   | . |          |

Table 11. Supplemental data- Pearson correlation coefficients for original data sets

|   |                                   | Independents |          |                                   |      |          |                             |      |          |  |
|---|-----------------------------------|--------------|----------|-----------------------------------|------|----------|-----------------------------|------|----------|--|
|   |                                   | 6            |          |                                   | 7    |          |                             | 8    |          |  |
| 1 | Extract. lipid to Aged Ventral L* |              |          | Early firmness to Aged Ventral L* |      |          | Early pH to Aged Ventral L* |      |          |  |
|   | Study                             | N            | Corr     | Study                             | N    | Corr     | Study                       | N    | Corr     |  |
|   | A                                 | .            | .        | A                                 | .    | .        | A                           | .    | .        |  |
|   | B                                 | .            | .        | B                                 | .    | .        | B                           | .    | .        |  |
|   | C                                 | 1236         | 0.16099  | C                                 | 1231 | -0.12722 | C                           | 1165 | -0.26175 |  |
|   | D                                 | 124          | 0.17588  | D                                 | 125  | 0.00314  | D                           | 98   | -0.66577 |  |
|   | E                                 | 177          | 0.00199  | E                                 | 177  | -0.07063 | E                           | 177  | -0.16729 |  |
|   | F                                 | 144          | 0.18712  | F                                 | 144  | 0.06137  | F                           | 144  | -0.63867 |  |
|   | G                                 | 304          | 0.13492  | G                                 | 314  | -0.04613 | G                           | 315  | -0.54824 |  |
|   | H                                 | 160          | 0.1276   | H                                 | 160  | -0.16646 | H                           | 160  | -0.30759 |  |
|   | I                                 | 558          | 0.22754  | I                                 | 557  | -0.03013 | I                           | 559  | -0.47151 |  |
|   | J                                 | 1394         | 0.19009  | J                                 | 1399 | -0.32406 | J                           | 1121 | -0.55358 |  |
|   | K                                 | .            | .        | K                                 | .    | .        | K                           | .    | .        |  |
| 2 | Extract. lipid to Aged ventral a* |              |          | Early firmness to Aged ventral a* |      |          | Early pH to Aged ventral a* |      |          |  |
|   | Study                             | N            | Corr     | Study                             | N    | Corr     | Study                       | N    | Corr     |  |
|   | A                                 | .            | .        | A                                 | .    | .        | A                           | .    | .        |  |
|   | B                                 | .            | .        | B                                 | .    | .        | B                           | .    | .        |  |
|   | C                                 | 1236         | 0.15403  | C                                 | 1231 | 0.00384  | C                           | 1165 | -0.08883 |  |
|   | D                                 | 124          | 0.20733  | D                                 | 125  | 0.0319   | D                           | 98   | 0.08     |  |
|   | E                                 | 177          | 0.18126  | E                                 | 177  | 0.19304  | E                           | 177  | -0.01949 |  |
|   | F                                 | 144          | 0.10154  | F                                 | 144  | 0.03424  | F                           | 144  | -0.37052 |  |
|   | G                                 | 304          | 0.11153  | G                                 | 314  | -0.11743 | G                           | 315  | -0.25994 |  |
|   | H                                 | 160          | 0.19187  | H                                 | 160  | 0.14578  | H                           | 160  | -0.00396 |  |
|   | I                                 | 558          | 0.21716  | I                                 | 557  | 0.04012  | I                           | 559  | -0.15641 |  |
|   | J                                 | 1394         | -0.01429 | J                                 | 1399 | -0.01906 | J                           | 1121 | -0.36087 |  |
|   | K                                 | .            | .        | K                                 | .    | .        | K                           | .    | .        |  |
| 3 | Extract. lipid to Aged ventral b* |              |          | Early firmness to Aged ventral b* |      |          | Early pH to Aged ventral b* |      |          |  |
|   | Study                             | N            | Corr     | Study                             | N    | Corr     | Study                       | N    | Corr     |  |
|   | A                                 | .            | .        | A                                 | .    | .        | A                           | .    | .        |  |
|   | B                                 | .            | .        | B                                 | .    | .        | B                           | .    | .        |  |
|   | C                                 | 1236         | 0.20627  | C                                 | 1231 | -0.04393 | C                           | 1165 | -0.22957 |  |
|   | D                                 | 124          | 0.20439  | D                                 | 125  | 0.00698  | D                           | 98   | -0.65948 |  |
|   | E                                 | 177          | 0.13876  | E                                 | 177  | 0.10112  | E                           | 177  | -0.13522 |  |
|   | F                                 | 144          | 0.13127  | F                                 | 144  | 0.20588  | F                           | 144  | -0.52848 |  |
|   | G                                 | 304          | 0.1227   | G                                 | 314  | 0.00392  | G                           | 315  | -0.54753 |  |
|   | H                                 | 160          | 0.29507  | H                                 | 160  | 0.00754  | H                           | 160  | -0.12598 |  |
|   | I                                 | 558          | 0.30121  | I                                 | 557  | 0.08047  | I                           | 559  | -0.41405 |  |
|   | J                                 | 1394         | 0.18964  | J                                 | 1399 | -0.20506 | J                           | 1121 | -0.67125 |  |
|   | K                                 | .            | .        | K                                 | .    | .        | K                           | .    | .        |  |

**Table 11.** Supplemental data- Pearson correlation coefficients for original data sets

|   |                                         | Independents |                                         |          |       |      |          |       |      |          |
|---|-----------------------------------------|--------------|-----------------------------------------|----------|-------|------|----------|-------|------|----------|
|   |                                         | 6            |                                         |          | 7     |      |          | 8     |      |          |
| 4 | Extract. lipid to Aged Ventral color    | Study        | N                                       | Corr     | Study | N    | Corr     | Study | N    | Corr     |
|   |                                         | A            | 154                                     | 0.11875  | A     | 151  | 0.11151  | A     | 151  | 0.15845  |
|   |                                         | B            | .                                       | .        | B     | .    | .        | B     | .    | .        |
|   |                                         | C            | 1236                                    | -0.11092 | C     | 1231 | 0.17662  | C     | 1165 | 0.26391  |
|   |                                         | D            | 124                                     | -0.14688 | D     | 125  | 0.05745  | D     | 98   | 0.5773   |
|   |                                         | E            | 177                                     | 0.06647  | E     | 177  | 0.02171  | E     | 177  | 0.09995  |
|   |                                         | F            | 144                                     | -0.13171 | F     | 144  | 0.13013  | F     | 144  | 0.48916  |
|   |                                         | G            | 303                                     | -0.0032  | G     | 313  | 0.29939  | G     | 314  | 0.45737  |
|   |                                         | H            | 160                                     | 0.06484  | H     | 160  | 0.21216  | H     | 160  | 0.2568   |
|   |                                         | I            | 558                                     | -0.05939 | I     | 557  | 0.02384  | I     | 559  | 0.49787  |
|   |                                         | J            | 1394                                    | 0.15328  | J     | 1399 | 0.35145  | J     | 1121 | 0.4241   |
|   |                                         | K            | .                                       | .        | K     | .    | .        | K     | .    | .        |
|   |                                         | 5            | Extract. lipid to Aged Ventral marbling | Study    | N     | Corr | Study    | N     | Corr | Study    |
| A | 154                                     |              |                                         | 0.18425  | A     | 151  | 0.00462  | A     | 151  | 0.14739  |
| B | .                                       |              |                                         | .        | B     | .    | .        | B     | .    | .        |
| C | 1236                                    |              |                                         | 0.54055  | C     | 1231 | 0.25903  | C     | 1165 | 0.08559  |
| D | 124                                     |              |                                         | 0.67645  | D     | 125  | -0.04056 | D     | 98   | 0.25667  |
| E | 177                                     |              |                                         | 0.48191  | E     | 177  | 0.12702  | E     | 177  | 0.06791  |
| F | 144                                     |              |                                         | 0.58434  | F     | 144  | 0.02707  | F     | 144  | 0.10943  |
| G | 303                                     |              |                                         | 0.42568  | G     | 313  | 0.27697  | G     | 314  | 0.29626  |
| H | 160                                     |              |                                         | 0.58731  | H     | 160  | 0.35736  | H     | 160  | 0.09438  |
| I | 558                                     |              |                                         | 0.57773  | I     | 557  | 0.1965   | I     | 559  | 0.30007  |
| J | 1394                                    |              |                                         | 0.80374  | J     | 1399 | 0.4202   | J     | 1121 | 0.27483  |
| K | .                                       |              |                                         | .        | K     | .    | .        | K     | .    | .        |
| 6 | Extract. lipid to Aged Ventral firmness |              |                                         | Study    | N     | Corr | Study    | N     | Corr | Study    |
|   |                                         | A            | 154                                     | -0.09819 | A     | 151  | 0.12707  | A     | 151  | 0.00072  |
|   |                                         | B            | .                                       | .        | B     | .    | .        | B     | .    | .        |
|   |                                         | C            | 1236                                    | 0.1657   | C     | 1231 | 0.15948  | C     | 1165 | -0.06152 |
|   |                                         | D            | 124                                     | -0.03278 | D     | 125  | 0.00089  | D     | 98   | -0.19178 |
|   |                                         | E            | 177                                     | 0.26784  | E     | 177  | 0.17044  | E     | 177  | 0.08586  |
|   |                                         | F            | 144                                     | 0.12356  | F     | 144  | 0.1307   | F     | 144  | 0.15769  |
|   |                                         | G            | 303                                     | 0.16249  | G     | 313  | 0.18381  | G     | 314  | 0.06904  |
|   |                                         | H            | 160                                     | 0.17034  | H     | 160  | 0.26154  | H     | 160  | 0.01891  |
|   |                                         | I            | 558                                     | 0.09721  | I     | 557  | 0.12357  | I     | 559  | 0.10489  |
|   |                                         | J            | 1394                                    | 0.48343  | J     | 1399 | 0.46691  | J     | 1121 | 0.31244  |
|   |                                         | K            | .                                       | .        | K     | .    | .        | K     | .    | .        |
|   |                                         |              | Early firmness to Aged Ventral color    | Study    | N     | Corr | Study    | N     | Corr | Study    |
| A | 154                                     |              |                                         | 0.11875  | A     | 151  | 0.11151  | A     | 151  | 0.15845  |
| B | .                                       |              |                                         | .        | B     | .    | .        | B     | .    | .        |
| C | 1236                                    |              |                                         | -0.11092 | C     | 1231 | 0.17662  | C     | 1165 | 0.26391  |
| D | 124                                     |              |                                         | -0.14688 | D     | 125  | 0.05745  | D     | 98   | 0.5773   |
| E | 177                                     |              |                                         | 0.06647  | E     | 177  | 0.02171  | E     | 177  | 0.09995  |
| F | 144                                     |              |                                         | -0.13171 | F     | 144  | 0.13013  | F     | 144  | 0.48916  |
| G | 303                                     |              |                                         | -0.0032  | G     | 313  | 0.29939  | G     | 314  | 0.45737  |
| H | 160                                     |              |                                         | 0.06484  | H     | 160  | 0.21216  | H     | 160  | 0.2568   |
| I | 558                                     |              |                                         | -0.05939 | I     | 557  | 0.02384  | I     | 559  | 0.49787  |
| J | 1394                                    |              |                                         | 0.15328  | J     | 1399 | 0.35145  | J     | 1121 | 0.4241   |
| K | .                                       |              |                                         | .        | K     | .    | .        | K     | .    | .        |
|   | Early firmness to Aged Ventral marbling |              |                                         | Study    | N     | Corr | Study    | N     | Corr | Study    |
|   |                                         | A            | 154                                     | 0.18425  | A     | 151  | 0.00462  | A     | 151  | 0.14739  |
|   |                                         | B            | .                                       | .        | B     | .    | .        | B     | .    | .        |
|   |                                         | C            | 1236                                    | 0.54055  | C     | 1231 | 0.25903  | C     | 1165 | 0.08559  |
|   |                                         | D            | 124                                     | 0.67645  | D     | 125  | -0.04056 | D     | 98   | 0.25667  |
|   |                                         | E            | 177                                     | 0.48191  | E     | 177  | 0.12702  | E     | 177  | 0.06791  |
|   |                                         | F            | 144                                     | 0.58434  | F     | 144  | 0.02707  | F     | 144  | 0.10943  |
|   |                                         | G            | 303                                     | 0.42568  | G     | 313  | 0.27697  | G     | 314  | 0.29626  |
|   |                                         | H            | 160                                     | 0.58731  | H     | 160  | 0.35736  | H     | 160  | 0.09438  |
|   |                                         | I            | 558                                     | 0.57773  | I     | 557  | 0.1965   | I     | 559  | 0.30007  |
|   |                                         | J            | 1394                                    | 0.80374  | J     | 1399 | 0.4202   | J     | 1121 | 0.27483  |
|   |                                         | K            | .                                       | .        | K     | .    | .        | K     | .    | .        |
|   |                                         |              | Early pH to Aged Ventral color          | Study    | N     | Corr | Study    | N     | Corr | Study    |
| A | 154                                     |              |                                         | 0.11875  | A     | 151  | 0.11151  | A     | 151  | 0.15845  |
| B | .                                       |              |                                         | .        | B     | .    | .        | B     | .    | .        |
| C | 1236                                    |              |                                         | -0.11092 | C     | 1231 | 0.17662  | C     | 1165 | 0.26391  |
| D | 124                                     |              |                                         | -0.14688 | D     | 125  | 0.05745  | D     | 98   | 0.5773   |
| E | 177                                     |              |                                         | 0.06647  | E     | 177  | 0.02171  | E     | 177  | 0.09995  |
| F | 144                                     |              |                                         | -0.13171 | F     | 144  | 0.13013  | F     | 144  | 0.48916  |
| G | 303                                     |              |                                         | -0.0032  | G     | 313  | 0.29939  | G     | 314  | 0.45737  |
| H | 160                                     |              |                                         | 0.06484  | H     | 160  | 0.21216  | H     | 160  | 0.2568   |
| I | 558                                     |              |                                         | -0.05939 | I     | 557  | 0.02384  | I     | 559  | 0.49787  |
| J | 1394                                    |              |                                         | 0.15328  | J     | 1399 | 0.35145  | J     | 1121 | 0.4241   |
| K | .                                       |              |                                         | .        | K     | .    | .        | K     | .    | .        |
|   | Early pH to Aged Ventral marbling       |              |                                         | Study    | N     | Corr | Study    | N     | Corr | Study    |
|   |                                         | A            | 154                                     | 0.18425  | A     | 151  | 0.00462  | A     | 151  | 0.14739  |
|   |                                         | B            | .                                       | .        | B     | .    | .        | B     | .    | .        |
|   |                                         | C            | 1236                                    | 0.54055  | C     | 1231 | 0.25903  | C     | 1165 | 0.08559  |
|   |                                         | D            | 124                                     | 0.67645  | D     | 125  | -0.04056 | D     | 98   | 0.25667  |
|   |                                         | E            | 177                                     | 0.48191  | E     | 177  | 0.12702  | E     | 177  | 0.06791  |
|   |                                         | F            | 144                                     | 0.58434  | F     | 144  | 0.02707  | F     | 144  | 0.10943  |
|   |                                         | G            | 303                                     | 0.42568  | G     | 313  | 0.27697  | G     | 314  | 0.29626  |
|   |                                         | H            | 160                                     | 0.58731  | H     | 160  | 0.35736  | H     | 160  | 0.09438  |
|   |                                         | I            | 558                                     | 0.57773  | I     | 557  | 0.1965   | I     | 559  | 0.30007  |
|   |                                         | J            | 1394                                    | 0.80374  | J     | 1399 | 0.4202   | J     | 1121 | 0.27483  |
|   |                                         | K            | .                                       | .        | K     | .    | .        | K     | .    | .        |
|   |                                         |              | Early pH to Aged Ventral firmness       | Study    | N     | Corr | Study    | N     | Corr | Study    |
| A | 154                                     |              |                                         | -0.09819 | A     | 151  | 0.12707  | A     | 151  | 0.00072  |
| B | .                                       |              |                                         | .        | B     | .    | .        | B     | .    | .        |
| C | 1236                                    |              |                                         | 0.1657   | C     | 1231 | 0.15948  | C     | 1165 | -0.06152 |
| D | 124                                     |              |                                         | -0.03278 | D     | 125  | 0.00089  | D     | 98   | -0.19178 |
| E | 177                                     |              |                                         | 0.26784  | E     | 177  | 0.17044  | E     | 177  | 0.08586  |
| F | 144                                     |              |                                         | 0.12356  | F     | 144  | 0.1307   | F     | 144  | 0.15769  |
| G | 303                                     |              |                                         | 0.16249  | G     | 313  | 0.18381  | G     | 314  | 0.06904  |
| H | 160                                     |              |                                         | 0.17034  | H     | 160  | 0.26154  | H     | 160  | 0.01891  |
| I | 558                                     |              |                                         | 0.09721  | I     | 557  | 0.12357  | I     | 559  | 0.10489  |
| J | 1394                                    |              |                                         | 0.48343  | J     | 1399 | 0.46691  | J     | 1121 | 0.31244  |
| K | .                                       |              |                                         | .        | K     | .    | .        | K     | .    | .        |



**Table 11.** Supplemental data- Pearson correlation coefficients for original data sets

|          |                                | <b>Independents</b>            |       |          |                                |                                |       |          |                          |                          |       |          |
|----------|--------------------------------|--------------------------------|-------|----------|--------------------------------|--------------------------------|-------|----------|--------------------------|--------------------------|-------|----------|
|          |                                | <b>6</b>                       |       |          | <b>7</b>                       |                                |       | <b>8</b> |                          |                          |       |          |
| <b>7</b> | Extract. lipid to Aged chop L* | Study                          | N     | Corr     | Early firmness to Aged chop L* | Study                          | N     | Corr     | Early pH to Aged chop L* | Study                    | N     | Corr     |
|          |                                | A                              | 154   | -0.14369 |                                | A                              | 151   | -0.10774 |                          | A                        | 151   | -0.31041 |
|          |                                | B                              | .     | .        |                                | B                              | 817   | -0.15356 |                          | B                        | 818   | -0.47036 |
|          |                                | C                              | 1236  | 0.18409  |                                | C                              | 1231  | -0.19735 |                          | C                        | 1165  | -0.25958 |
|          |                                | D                              | 124   | 0.14021  |                                | D                              | 125   | 0.06525  |                          | D                        | 98    | -0.71079 |
|          |                                | E                              | 177   | 0.0158   |                                | E                              | 177   | 0.02358  |                          | E                        | 177   | -0.14655 |
|          |                                | F                              | 144   | 0.25488  |                                | F                              | 144   | -0.07337 |                          | F                        | 144   | -0.56024 |
|          |                                | G                              | 294   | 0.13853  |                                | G                              | 294   | 0.03901  |                          | G                        | 295   | 0.08628  |
|          |                                | H                              | 160   | 0.17172  |                                | H                              | 160   | -0.19524 |                          | H                        | 160   | -0.28003 |
|          |                                | I                              | 559   | 0.30343  |                                | I                              | 557   | 0.00233  |                          | I                        | 559   | -0.49483 |
|          |                                | J                              | 522   | 0.02615  |                                | J                              | 525   | -0.33856 |                          | J                        | 415   | -0.51673 |
|          |                                | K                              | 173   | 0.14132  |                                | K                              | 173   | 0.04407  |                          | K                        | 173   | -0.07428 |
|          | <b>8</b>                       | Extract. lipid to Aged chop a* | Study | N        | Corr                           | Early firmness to Aged chop a* | Study | N        | Corr                     | Early pH to Aged chop a* | Study | N        |
|          |                                | A                              | 154   | 0.12665  |                                | A                              | 151   | 0.04205  |                          | A                        | 151   | -0.14954 |
|          |                                | B                              | .     | .        |                                | B                              | 817   | -0.02804 |                          | B                        | 818   | -0.20678 |
|          |                                | C                              | 1236  | 0.26849  |                                | C                              | 1231  | 0.05992  |                          | C                        | 1165  | -0.16072 |
|          |                                | D                              | 124   | 0.37937  |                                | D                              | 125   | 0.06765  |                          | D                        | 98    | 0.06355  |
|          |                                | E                              | 177   | 0.08882  |                                | E                              | 177   | 0.10454  |                          | E                        | 177   | -0.12347 |
|          |                                | F                              | 144   | 0.2434   |                                | F                              | 144   | 0.07153  |                          | F                        | 144   | -0.29383 |
|          |                                | G                              | 294   | 0.10516  |                                | G                              | 294   | 0.01965  |                          | G                        | 295   | 0.1132   |
|          |                                | H                              | 160   | 0.21673  |                                | H                              | 160   | 0.15116  |                          | H                        | 160   | -0.09164 |
|          |                                | I                              | 559   | 0.33176  |                                | I                              | 557   | -0.02514 |                          | I                        | 559   | -0.24994 |
|          |                                | J                              | 522   | 0.16453  |                                | J                              | 525   | 0.10948  |                          | J                        | 415   | -0.04902 |
|          |                                | K                              | 173   | 0.07651  |                                | K                              | 173   | -0.07019 |                          | K                        | 173   | -0.27862 |
| <b>9</b> |                                | Extract. lipid to Aged chop b* | Study | N        | Corr                           | Early firmness to Aged chop b* | Study | N        | Corr                     | Early pH to Aged chop b* | Study | N        |
|          |                                | A                              | 154   | 0.0236   |                                | A                              | 151   | -0.03698 |                          | A                        | 151   | -0.39039 |
|          |                                | B                              | .     | .        |                                | B                              | 817   | -0.0657  |                          | B                        | 818   | -0.33015 |
|          |                                | C                              | 1236  | 0.37573  |                                | C                              | 1231  | -0.0391  |                          | C                        | 1165  | -0.30709 |
|          |                                | D                              | 124   | 0.32164  |                                | D                              | 125   | 0.07312  |                          | D                        | 98    | -0.58951 |
|          |                                | E                              | 177   | 0.09459  |                                | E                              | 177   | 0.07708  |                          | E                        | 177   | -0.12186 |
|          |                                | F                              | 144   | 0.35251  |                                | F                              | 144   | 0.09223  |                          | F                        | 144   | -0.45242 |
|          |                                | G                              | 294   | 0.17866  |                                | G                              | 294   | 0.02826  |                          | G                        | 295   | 0.11986  |
|          |                                | H                              | 160   | 0.33642  |                                | H                              | 160   | -0.10018 |                          | H                        | 160   | -0.23108 |
|          |                                | I                              | 559   | 0.43668  |                                | I                              | 557   | 0.0023   |                          | I                        | 559   | -0.44856 |
|          |                                | J                              | 522   | 0.2557   |                                | J                              | 525   | -0.10816 |                          | J                        | 415   | -0.19875 |
|          |                                | K                              | 173   | 0.16703  |                                | K                              | 173   | 0.13233  |                          | K                        | 173   | -0.01885 |

**Table 11.** Supplemental data- Pearson correlation coefficients for original data sets

|    |                                      | Independents |          |                                      |      |          |                                |      |          |  |
|----|--------------------------------------|--------------|----------|--------------------------------------|------|----------|--------------------------------|------|----------|--|
|    |                                      | 6            |          |                                      | 7    |          |                                | 8    |          |  |
| 10 | Extract. lipid to Aged chop color    |              |          | Early firmness to Aged chop color    |      |          | Early pH to Aged chop color    |      |          |  |
|    | Study                                | N            | Corr     | Study                                | N    | Corr     | Study                          | N    | Corr     |  |
|    | A                                    | .            | .        | A                                    | .    | .        | A                              | .    | .        |  |
|    | B                                    | .            | .        | B                                    | 817  | 0.16805  | B                              | 818  | 0.45191  |  |
|    | C                                    | 1236         | -0.0995  | C                                    | 1231 | 0.1889   | C                              | 1165 | 0.16197  |  |
|    | D                                    | 124          | 0.05469  | D                                    | 125  | 0.0684   | D                              | 98   | 0.50708  |  |
|    | E                                    | 177          | 0.15681  | E                                    | 177  | 0.19043  | E                              | 177  | 0.14319  |  |
|    | F                                    | 144          | -0.10309 | F                                    | 144  | 0.15619  | F                              | 144  | 0.51434  |  |
|    | G                                    | 303          | -0.06548 | G                                    | 303  | 0.29619  | G                              | 304  | 0.42258  |  |
|    | H                                    | 160          | 0.00103  | H                                    | 160  | 0.20526  | H                              | 160  | 0.2047   |  |
|    | I                                    | 559          | -0.10596 | I                                    | 557  | 0.03362  | I                              | 559  | 0.50183  |  |
|    | J                                    | 522          | 0.1953   | J                                    | 525  | 0.37285  | J                              | 415  | 0.54568  |  |
|    | K                                    | .            | .        | K                                    | .    | .        | K                              | .    | .        |  |
| 11 | Extract. lipid to Aged chop marbling |              |          | Early firmness to Aged chop marbling |      |          | Early pH to Aged chop marbling |      |          |  |
|    | Study                                | N            | Corr     | Study                                | N    | Corr     | Study                          | N    | Corr     |  |
|    | A                                    | .            | .        | A                                    | .    | .        | A                              | .    | .        |  |
|    | B                                    | .            | .        | B                                    | 817  | 0.22768  | B                              | 818  | 0.17334  |  |
|    | C                                    | 1236         | 0.67023  | C                                    | 1231 | 0.28948  | C                              | 1165 | 0.05597  |  |
|    | D                                    | 124          | 0.6981   | D                                    | 125  | 0.09195  | D                              | 98   | 0.20619  |  |
|    | E                                    | 177          | 0.69025  | E                                    | 177  | 0.06567  | E                              | 177  | 0.11814  |  |
|    | F                                    | 144          | 0.76303  | F                                    | 144  | -0.00374 | F                              | 144  | 0.02202  |  |
|    | G                                    | 301          | 0.61692  | G                                    | 301  | 0.15297  | G                              | 302  | 0.25983  |  |
|    | H                                    | 160          | 0.53758  | H                                    | 160  | 0.26166  | H                              | 160  | 0.11412  |  |
|    | I                                    | 559          | 0.75374  | I                                    | 557  | 0.19529  | I                              | 559  | 0.17679  |  |
|    | J                                    | 522          | 0.74981  | J                                    | 525  | 0.42477  | J                              | 415  | 0.3528   |  |
|    | K                                    | .            | .        | K                                    | .    | .        | K                              | .    | .        |  |
| 12 | Extract. lipid to Aged chop firmness |              |          | Early firmness to Aged chop firmness |      |          | Early pH to Aged chop firmness |      |          |  |
|    | Study                                | N            | Corr     | Study                                | N    | Corr     | Study                          | N    | Corr     |  |
|    | A                                    | 154          | 0.1078   | A                                    | 151  | 0.23763  | A                              | 151  | -0.03743 |  |
|    | B                                    | .            | .        | B                                    | 817  | 0.10781  | B                              | 818  | 0.03228  |  |
|    | C                                    | 1236         | 0.13637  | C                                    | 1231 | 0.0555   | C                              | 1165 | -0.03999 |  |
|    | D                                    | 124          | 0.17492  | D                                    | 125  | 0.16036  | D                              | 98   | -0.04382 |  |
|    | E                                    | .            | .        | E                                    | .    | .        | E                              | .    | .        |  |
|    | F                                    | 144          | 0.11805  | F                                    | 144  | -0.01222 | F                              | 144  | -0.06843 |  |
|    | G                                    | .            | .        | G                                    | .    | .        | G                              | .    | .        |  |
|    | H                                    | 160          | 0.22497  | H                                    | 160  | 0.22529  | H                              | 160  | -0.15183 |  |
|    | I                                    | 559          | 0.1127   | I                                    | 557  | 0.09806  | I                              | 559  | 0.06015  |  |
|    | J                                    | .            | .        | J                                    | .    | .        | J                              | .    | .        |  |
|    | K                                    | .            | .        | K                                    | .    | .        | K                              | .    | .        |  |

**Table 11.** Supplemental data- Pearson correlation coefficients for original data sets

|    |                                           | Independents |          |                                           |      |          |                                     |      |          |  |
|----|-------------------------------------------|--------------|----------|-------------------------------------------|------|----------|-------------------------------------|------|----------|--|
|    |                                           | 6            |          |                                           | 7    |          |                                     | 8    |          |  |
| 13 | Extract. lipid to Instrumental tenderness |              |          | Early firmness to Instrumental tenderness |      |          | Early pH to Instrumental tenderness |      |          |  |
|    | Study                                     | N            | Corr     | Study                                     | N    | Corr     | Study                               | N    | Corr     |  |
|    | A                                         | 154          | 0.03156  | A                                         | 151  | 0.13339  | A                                   | 151  | 0.04406  |  |
|    | B                                         | .            | .        | B                                         | 817  | -0.14574 | B                                   | 818  | -0.26284 |  |
|    | C                                         | 1234         | -0.01396 | C                                         | 1229 | -0.09363 | C                                   | 1163 | -0.09131 |  |
|    | D                                         | 117          | -0.19077 | D                                         | 118  | -0.02558 | D                                   | 93   | -0.21056 |  |
|    | E                                         | 177          | -0.08978 | E                                         | 177  | 0.07152  | E                                   | 177  | 0.09369  |  |
|    | F                                         | 144          | -0.22835 | F                                         | 144  | 0.15145  | F                                   | 144  | 0.06693  |  |
|    | G                                         | 299          | -0.06574 | G                                         | 299  | 0.02496  | G                                   | 300  | 0.15909  |  |
|    | H                                         | 160          | -0.23012 | H                                         | 160  | 0.03109  | H                                   | 160  | 0.08143  |  |
|    | I                                         | 555          | -0.23883 | I                                         | 553  | 0.04995  | I                                   | 555  | 0.06248  |  |
|    | J                                         | 1394         | -0.18896 | J                                         | 1399 | -0.09575 | J                                   | 1121 | -0.01482 |  |
|    | K                                         | 173          | -0.24563 | K                                         | 173  | -0.23831 | K                                   | 173  | -0.16404 |  |
| 14 | Extract. lipid to Cook loss               |              |          | Early firmness to Cook loss               |      |          | Early pH to Cook loss               |      |          |  |
|    | Study                                     | N            | Corr     | Study                                     | N    | Corr     | Study                               | N    | Corr     |  |
|    | A                                         | 151          | -0.03176 | A                                         | 149  | 0.086    | A                                   | 149  | -0.02042 |  |
|    | B                                         | .            | .        | B                                         | 817  | -0.15011 | B                                   | 818  | -0.54277 |  |
|    | C                                         | 1234         | -0.06321 | C                                         | 1229 | -0.10018 | C                                   | 1163 | -0.11896 |  |
|    | D                                         | 117          | -0.06113 | D                                         | 118  | -0.02211 | D                                   | 93   | -0.28338 |  |
|    | E                                         | 177          | -0.02772 | E                                         | 177  | 0.07882  | E                                   | 177  | 0.13081  |  |
|    | F                                         | 144          | 0.18266  | F                                         | 144  | -0.0113  | F                                   | 144  | 0.08123  |  |
|    | G                                         | 301          | 0.0129   | G                                         | 301  | -0.21747 | G                                   | 302  | -0.32897 |  |
|    | H                                         | 160          | -0.01268 | H                                         | 160  | -0.09814 | H                                   | 160  | -0.12598 |  |
|    | I                                         | 557          | -0.01004 | I                                         | 555  | -0.04938 | I                                   | 557  | -0.08298 |  |
|    | J                                         | 1394         | -0.16623 | J                                         | 1399 | -0.33461 | J                                   | 1121 | -0.57082 |  |
|    | K                                         | 171          | 0.0161   | K                                         | 171  | 0.06243  | K                                   | 171  | -0.14131 |  |
| 15 | Extract. lipid to Tenderness              |              |          | Early firmness to Tenderness              |      |          | Early pH to Tenderness              |      |          |  |
|    | Study                                     | N            | Corr     | Study                                     | N    | Corr     | Study                               | N    | Corr     |  |
|    | A                                         | 154          | -0.09073 | A                                         | 151  | -0.00329 | A                                   | 151  | 0.10412  |  |
|    | B                                         | .            | .        | B                                         | .    | .        | B                                   | .    | .        |  |
|    | C                                         | 304          | 0.03356  | C                                         | 300  | 0.15852  | C                                   | 283  | 0.11883  |  |
|    | D                                         | 124          | 0.09287  | D                                         | 125  | -0.12281 | D                                   | 98   | 0.26887  |  |
|    | E                                         | .            | .        | E                                         | .    | .        | E                                   | .    | .        |  |
|    | F                                         | 144          | 0.02188  | F                                         | 144  | 0.02578  | F                                   | 144  | -0.01962 |  |
|    | G                                         | .            | .        | G                                         | .    | .        | G                                   | .    | .        |  |
|    | H                                         | 160          | -0.00544 | H                                         | 160  | -0.03601 | H                                   | 160  | 0.1163   |  |
|    | I                                         | 147          | 0.09567  | I                                         | 147  | 0.1313   | I                                   | 147  | 0.32581  |  |
|    | J                                         | 522          | 0.2515   | J                                         | 525  | 0.2572   | J                                   | 415  | 0.36906  |  |
|    | K                                         | .            | .        | K                                         | .    | .        | K                                   | .    | .        |  |

**Table 11.** Supplemental data- Pearson correlation coefficients for original data sets

|                   |           | <b>Independents</b>                |          |          |                                    |          |          |                              |          |          |
|-------------------|-----------|------------------------------------|----------|----------|------------------------------------|----------|----------|------------------------------|----------|----------|
|                   |           | <b>6</b>                           |          |          | <b>7</b>                           |          |          | <b>8</b>                     |          |          |
| <b>Dependents</b> | <b>16</b> | <b>Extract. lipid to Juiciness</b> |          |          | <b>Early firmness to Juiciness</b> |          |          | <b>Early pH to Juiciness</b> |          |          |
|                   |           | Study                              | N        | Corr     | Study                              | N        | Corr     | Study                        | N        | Corr     |
|                   |           | A                                  | 154      | -0.09301 | A                                  | 151      | 0.12713  | A                            | 151      | 0.07699  |
|                   |           | B                                  | .        | .        | B                                  | .        | .        | B                            | .        | .        |
|                   |           | C                                  | 304      | -0.11358 | C                                  | 300      | 0.0219   | C                            | 283      | -0.00944 |
|                   |           | D                                  | 124      | 0.15494  | D                                  | 125      | -0.05659 | D                            | 98       | 0.16808  |
|                   | E         | .                                  | .        | E        | .                                  | .        | E        | .                            | .        |          |
|                   | F         | 144                                | -0.07328 | F        | 144                                | 0.00599  | F        | 144                          | -0.07487 |          |
|                   | G         | .                                  | .        | G        | .                                  | .        | G        | .                            | .        |          |
|                   | H         | 160                                | -0.04919 | H        | 160                                | -0.14615 | H        | 160                          | 0.22823  |          |
|                   | I         | 147                                | 0.00729  | I        | 147                                | -0.13733 | I        | 147                          | 0.11213  |          |
|                   | J         | 522                                | 0.17916  | J        | 525                                | 0.28851  | J        | 415                          | 0.24973  |          |
|                   | K         | .                                  | .        | K        | .                                  | .        | K        | .                            | .        |          |
| <b>17</b>         |           | <b>Extract. lipid to Flavor</b>    |          |          | <b>Early firmness to Flavor</b>    |          |          | <b>Early pH to Flavor</b>    |          |          |
|                   |           | Study                              | N        | Corr     | Study                              | N        | Corr     | Study                        | N        | Corr     |
|                   |           | A                                  | .        | .        | A                                  | .        | .        | A                            | .        | .        |
|                   |           | B                                  | .        | .        | B                                  | .        | .        | B                            | .        | .        |
|                   |           | C                                  | 304      | -0.04837 | C                                  | 300      | -0.11993 | C                            | 283      | -0.00221 |
|                   |           | D                                  | 124      | -0.20565 | D                                  | 125      | 0.04098  | D                            | 98       | -0.09539 |
|                   | E         | .                                  | .        | E        | .                                  | .        | E        | .                            | .        |          |
|                   | F         | 144                                | 0.01881  | F        | 144                                | 0.06903  | F        | 144                          | -0.06908 |          |
|                   | G         | .                                  | .        | G        | .                                  | .        | G        | .                            | .        |          |
|                   | H         | 160                                | -0.03099 | H        | 160                                | -0.06227 | H        | 160                          | 0.13007  |          |
|                   | I         | 147                                | -0.02605 | I        | 147                                | 0.03418  | I        | 147                          | -0.02737 |          |
|                   | J         | 522                                | 0.28728  | J        | 525                                | 0.2443   | J        | 415                          | 0.14399  |          |
|                   | K         | .                                  | .        | K        | .                                  | .        | K        | .                            | .        |          |
